# Supplementary material for: Electronic Longitudinal Alcohol Study in Communities (ELAStiC) Wales – protocol for platform development
Source: PubMed Central journal article supplement (PMC8142962; doi:10.23889/ijpds.v4i1.581), 2019-05-20
Supplement: ijpds-04-581-s001.pdf [file ijpds-04-581-s001.pdf]

**S1. Variables defined based on Patient Episode Database for Wales (PEDW) data using International Statistical Classification of Disease and Related Health Problems (ICD-10) codes.**

| <b>Variable required</b> | <b>Description</b>                                                                     | <b>ICD-10 codes</b>                                                                                                                                                                                                                                   | <b>Position</b> |
|--------------------------|----------------------------------------------------------------------------------------|-------------------------------------------------------------------------------------------------------------------------------------------------------------------------------------------------------------------------------------------------------|-----------------|
| CHARLSON_SCORE           | Charlson comorbidity single score                                                      | Using CHARLSON_SC_FLAG_01 to CHARLSON_SC_FLAG_16 in 2-14 coding positions with individual weights                                                                                                                                                     | ANY             |
| CHARLSON_SC_FLAG_01      | Charlson score individual flag for acute myocardial infarction (Yes/No)                | I21.0-I21.9, I22.0-I22.9, I25.2, I23.0-I23.8, I25.8                                                                                                                                                                                                   | ANY             |
| CHARLSON_SC_FLAG_02      | Charlson score individual flag for cerebral-vascular accident (Yes/No)                 | G45.0, G45.1, G45.2, G45.4, G45.8, G45.9, G46.0-G46.8, I60.0-I60.9, I61.0-I61.9, I62.0-I62.9, I63.-I63.9, I64, I65.0-I65.9, I66.0-I66.9, I67.0, I67.1, I67.2, I67.4, I67.5, I67.6, I67.7, I6.78, I67.9, I68.1, I68.2, I68.8, I69.-I69.8, I67.3, I68.0 | ANY             |
| CHARLSON_SC_FLAG_03      | Charlson score individual flag for congestive heart failure (Yes/No)                   | I50.0-I50.9                                                                                                                                                                                                                                           | ANY             |
| CHARLSON_SC_FLAG_04      | Charlson score individual flag for connective tissue disorder (Yes/No)                 | M05.0-M05.9, M06.0, M06.3, M06.9, M32.0-M32.9, M33.2, M34.0-M34.9, M35.3                                                                                                                                                                              | ANY             |
| CHARLSON_SC_FLAG_05      | Charlson score individual flag for dementia (Yes/No)                                   | F00.0-F00.9, F01.0-F01.9, F02.0-F02.8, F05.1,F03                                                                                                                                                                                                      | ANY             |
| CHARLSON_SC_FLAG_06      | Charlson score individual flag for diabetes (without long term complications) (Yes/No) | E10.1, E10.5, E10.9, E11.1, E11.5, E11.9, E13.1, E13.5, E13.9, E14.1, E14.5, E14.9, E10.6, E10.8, E11.6, E11.8, E13.6, E13.8, E14.6, E14.8                                                                                                            | ANY             |

| <b>Variable required</b> | <b>Description</b>                                                                  | <b>ICD-10 codes</b>                                                                                                                                                                                                         | <b>Position</b> |
|--------------------------|-------------------------------------------------------------------------------------|-----------------------------------------------------------------------------------------------------------------------------------------------------------------------------------------------------------------------------|-----------------|
| CHARLSON_SC_FLAG_07      | Charlson score individual flag for diabetes (with long term complications) (Yes/No) | E10.2, E10.3, E10.4, E11.2, E11.3, E11.4, E13.2, E13.3, E13.4, E14.2, E14.3, E14.4, E10.7, E11.7, E13.7, E14.7                                                                                                              | ANY             |
| CHARLSON_SC_FLAG_08      | Charlson score individual flag for mild or moderate liver disease (Yes/No)          | K70.2, K70.3, K71.7, K73.0-K73.9, K74.0, K74.1, K74.2, K74.3, K74.4, K74.5, K74.6                                                                                                                                           | ANY             |
| CHARLSON_SC_FLAG_09      | Charlson score individual flag for severe liver disease (Yes/No)                    | K72.1, K72.9, K76.6, K76.7                                                                                                                                                                                                  | ANY             |
| CHARLSON_SC_FLAG_10      | Charlson score individual flag for peptic ulcer (Yes/No)                            | K25, K26, K27, K28                                                                                                                                                                                                          | ANY             |
| CHARLSON_SC_FLAG_11      | Charlson score individual flag for peripheral vascular disease (Yes/No)             | I71.0-I71.9, I73.9, I79.0, R02, Z95.8, Z95.9                                                                                                                                                                                | ANY             |
| CHARLSON_SC_FLAG_12      | Charlson score individual flag for pulmonary disease (Yes/No)                       | J40, J41.0-J41.8, J42, J43.0-J43.9, J44.0-J44.9, J45.0-J45.9, J46, J47, J60, J61, J62.0-J62.8, J63.0-J63.8, J64, J65, J66.0-J66.8, J67.0-J67.9                                                                              | ANY             |
| CHARLSON_SC_FLAG_13      | Charlson score individual flag for cancer (Yes/No)                                  | C00.0-C76.8, C81.0-C85.9, C88.3, C88.7, C88.9, C90.0, C90.1, C91.0-C91.9, C92.0-C92.9, C93.0-C93.9, C94.0, C94.1, C94.2, C94.3, C94.5, C94.7, C95.0-C95.9, C96.0-C96.9, C80.0-C80.9, C88.0, C88.1, C88.2, C90.2, C94.4, C97 | ANY             |
| CHARLSON_SC_FLAG_14      | Charlson score individual flag for metastatic cancer (Yes/No)                       | C77.0-C77.9, C78.0-C78.8, C79.0-C79.9                                                                                                                                                                                       | ANY             |

| <b>Variable required</b> | <b>Description</b>                                        | <b>ICD-10 codes</b>                                                                                                                                                                                                                                                                                 | <b>Position</b> |
|--------------------------|-----------------------------------------------------------|-----------------------------------------------------------------------------------------------------------------------------------------------------------------------------------------------------------------------------------------------------------------------------------------------------|-----------------|
| CHARLSON_SC_FLAG_15      | Charlson score individual flag for paraplegia (Yes/No)    | G04.1, G81.0-G81.9, G82.0, G82.1, G82.2                                                                                                                                                                                                                                                             | ANY             |
| CHARLSON_SC_FLAG_16      | Charlson Score individual flag for renal disease (Yes/No) | N01, N03, N05.2, N05.3, N05.4, N05.5, N05.6, N07.2, N07.3, N07.4, N18.1-N18.9, N19, N25.0-N25.9, I12.0-I12.9, I13.0-I13.9                                                                                                                                                                           | ANY             |
| PEDW_ALC_FLAG_01         | Alcohol-related admission (Yes/No)                        | E24.4, E51.2, F10.0-F10.9, G31.2, G40.5, G62.1, G72.1, I42.6, K29.2, K70.0-K70.4, K70.9, K85.2, K86.0, O35.4, R78.0, T51.0, X45.0-X45.2, X45.4-X45.6, X45.8, X45.9, X65.0-X65.2, X65.4-X65.6, X65.8, X65.9, Y15.0, Y15.2, Y15.4, Y15.8, Y15.9, Y90.0-Y90.9, Y91.0-Y91.3, Y91.9, Z50.2, Z71.4, Z72.1 | ANY/123RZ       |
| PEDW_ALC_FLAG_03         | F100 Acute intoxication(Yes/No)                           | F10.0                                                                                                                                                                                                                                                                                               | ANY/123RZ       |
| PEDW_ALC_FLAG_04         | F101 Harmful use(Yes/No)                                  | F10.1                                                                                                                                                                                                                                                                                               | ANY/123RZ       |
| PEDW_ALC_FLAG_05         | F102 Dependence syndrome(Yes/No)                          | F10.2                                                                                                                                                                                                                                                                                               | ANY/123RZ       |
| PEDW_ALC_FLAG_06         | F103 Withdrawal(Yes/No)                                   | F10.3                                                                                                                                                                                                                                                                                               | ANY/123RZ       |
| PEDW_ALC_FLAG_07         | F104 Withdrawal state(Yes/No)                             | F10.4                                                                                                                                                                                                                                                                                               | ANY/123RZ       |
| PEDW_ALC_FLAG_08         | Other F (F105, F106, F107, F108, F109) codes(Yes/No)      | F10.5, F10.6, F10.7, F10.8, F10.9                                                                                                                                                                                                                                                                   | ANY/123RZ       |

| <b>Variable required</b> | <b>Description</b>                                                 | <b>ICD-10 codes</b>                                                  | <b>Position</b> |
|--------------------------|--------------------------------------------------------------------|----------------------------------------------------------------------|-----------------|
| PEDW_ALC_FLAG_09         | F10 Mental and behavioural disorders due to use of alcohol(Yes/No) | F10.0, F10.1, F10.2, F10.3, F10.4, F10.5, F10.6, F10.7, F10.8, F10.9 | ANY/123RZ       |
| PEDW_ALC_FLAG_10         | K700 Alcoholic fatty liver(Yes/No)                                 | K70.0                                                                | ANY/123RZ       |
| PEDW_ALC_FLAG_11         | K701 Alcoholic hepatitis(Yes/No)                                   | K70.1                                                                | ANY/123RZ       |
| PEDW_ALC_FLAG_12         | K702 Alcoholic fibrosis and sclerosis of liver(Yes/No)             | K70.2                                                                | ANY/123RZ       |
| PEDW_ALC_FLAG_13         | K703 Alcoholic cirrhosis of liver(Yes/No)                          | K70.3                                                                | ANY/123RZ       |
| PEDW_ALC_FLAG_14         | K704 Alcoholic hepatic failure(Yes/No)                             | K70.4                                                                | ANY/123RZ       |
| PEDW_ALC_FLAG_15         | K709 Alcoholic liver disease, unspecified(Yes/No)                  | K70.9                                                                | ANY/123RZ       |
| PEDW_ALC_FLAG_16         | K70 Alcoholic liver disease(Yes/No)                                | K70.0, K70.1, K70.2, K70.3, K70.4, K70.9                             | ANY/123RZ       |
| PEDW_ALC_FLAG_17         | K852 Alcohol-induced acute pancreatitis(Yes/No)                    | K85.2                                                                | ANY/123RZ       |
| PEDW_ALC_FLAG_18         | K860 Alcohol-induced chronic pancreatitis-<br>ANY (Yes/No)         | K86.0                                                                | ANY/123RZ       |
| PEDW_ALC_FLAG_19         | T510 Toxic effect: Ethanol(Yes/No)                                 | T51.0                                                                | ANY/123RZ       |

| <b>Variable required</b> | <b>Description</b>                                                  | <b>ICD-10 codes</b>                                                | <b>Position</b> |
|--------------------------|---------------------------------------------------------------------|--------------------------------------------------------------------|-----------------|
| PEDW_ALC_FLAG_20         | X45, X65 External cause of morbidity(Yes/No)                        | X45.0–X45.9, X65.0–X65.9                                           | ANY/123RZ       |
| PEDW_ALC_FLAG_21         | Y15, Y90, Y91 External cause of morbidity(Yes/No)                   | Y15.0, Y15.2, Y15.4, Y15.8, Y15.9, Y90.0–Y90.9, Y91.0–Y91.3, Y91.9 | ANY/123RZ       |
| PEDW_ALC_FLAG_22         | Z Alcohol use(Yes/No)                                               | Z50.2, Z71.4, Z72.1                                                | ANY/123RZ       |
| PEDW_ALC_FLAG_23         | Foetal alcohol syndrome(Yes/No)                                     | Q86.0                                                              | ANY/123RZ       |
| PEDW_ADD_FLAG_01         | Acute upper respiratory tract infections (Yes/No)                   | J00–J06, J10.1, J10.8, J11.1, J11.8                                | ANY/1STNONRZ    |
| PEDW_ADD_FLAG_02         | Influenza And Pneumonia (Yes/No)                                    | J09 – J18                                                          | ANY/1STNONRZ    |
| PEDW_ADD_FLAG_03         | Acute lower respiratory infections including bronchiolitis (Yes/No) | J20 – J22                                                          | ANY/1STNONRZ    |
| PEDW_ADD_FLAG_04         | Acute bronchiolitis (Yes/No)                                        | J21                                                                | ANY/1STNONRZ    |
| PEDW_ADD_FLAG_05         | Asthma (Yes/No)                                                     | J45–J46                                                            | ANY/1STNONRZ    |
| PEDW_ADD_FLAG_06         | Injury (Yes/No)                                                     | S00–T19                                                            | ANY/1STNONRZ    |
| PEDW_ADD_FLAG_07         | Burns (Yes/No)                                                      | T20–T32, T33–T35                                                   | ANY/1STNONRZ    |
| PEDW_ADD_FLAG_08         | Toxic effects (Yes/No)                                              | T36–T71, T74, T75, T79                                             | ANY/1STNONRZ    |
| PEDW_ADD_FLAG_09         | Head injury (Yes/No)                                                | S06.0, S02.0, S02.1, S02.2, S02.3, S02.7, S02.8, S06.1 to S06.9    | ANY/1STNONRZ    |
| PEDW_ADD_FLAG_10         | External causes short list (Yes/No)                                 | V01–V99                                                            | ANY/1STNONRZ    |

| <b>Variable required</b> | <b>Description</b>                                                                                     | <b>ICD-10 codes</b>                                                                                        | <b>Position</b> |
|--------------------------|--------------------------------------------------------------------------------------------------------|------------------------------------------------------------------------------------------------------------|-----------------|
| PEDW_ADD_FLAG_11         | External causes long list (Yes/No)                                                                     | V01-V99, W00-X59, X60-X84, X55-Y09, Y10-Y36                                                                | ANY/1STNONRZ    |
| PEDW_ADD_FLAG_12         | Gastro-intestinal infection (Yes/No)                                                                   | A00-A09                                                                                                    | ANY/1STNONRZ    |
| PEDW_ADD_FLAG_13         | Digestive (Yes/No)                                                                                     | K00-K93                                                                                                    | ANY/1STNONRZ    |
| PEDW_ADD_FLAG_14         | Perinatal / Neonatal admission (Yes/No)                                                                | P00 – P96                                                                                                  | ANY/1STNONRZ    |
| PEDW_ADD_FLAG_15         | Victimisation (Yes/No)                                                                                 | P96.1, T74, X85–Y34, Z04.0, Z04.5, Z04.8, Z60–Z63, Z65.3, Z72, Z74, Z76.1, Z76.2, Z81, Z86.5, Z91.6, Z91.8 | ANY/1STNONRZ    |
| PEDW_ADD_FLAG_16         | Maltreatment (Yes/No)                                                                                  | T74, Y06, Y07                                                                                              | ANY/1STNONRZ    |
| PEDW_ADD_FLAG_17         | Assault (Yes/No)                                                                                       | X85 – Y03, Y04, Y05, Y08, Y09                                                                              | ANY/1STNONRZ    |
| PEDW_ADD_FLAG_18         | Undetermined cause (Yes/No)                                                                            | Y10 – Y34, Z04.0, Z04.5, Z04.8                                                                             | ANY/1STNONRZ    |
| PEDW_ADD_FLAG_19         | Adverse social circumstances (Yes/No)                                                                  | P96.1, Z60–Z63, Z65.3, Z72, Z74, Z76.1, Z76.2, Z81, Z86.5, Z91.6, Z91.8                                    | ANY/1STNONRZ    |
| PEDW_ADD_FLAG_20         | Chemo/RT (Yes/No)                                                                                      | Z51.0-Z51.2, Z08.1, Z08.2, Z54.1, Z54.2                                                                    | ANY/1STNONRZ    |
| PEDW_CHP_01_FLAG         | Chapter I: Certain infectious and parasitic diseases (Yes/No)                                          | A00-B99                                                                                                    | ANY/1STNONRZ    |
| PEDW_CHP_02_FLAG         | Chapter II: Neoplasms (Yes/No)                                                                         | C00-D48                                                                                                    | ANY/1STNONRZ    |
| PEDW_CHP_03_FLAG         | Chapter III: Diseases of the blood and blood-forming organs and certain disorders involving the immune | D50-D89                                                                                                    | ANY/1STNONRZ    |

| <b>Variable required</b> | <b>Description</b>                                                                  | <b>ICD-10 codes</b> | <b>Position</b> |
|--------------------------|-------------------------------------------------------------------------------------|---------------------|-----------------|
|                          | mechanism (Yes/No)                                                                  |                     |                 |
| PEDW_CHP_04_FLAG         | Chapter IV: Endocrine, nutritional and metabolic diseases (Yes/No)                  | E00-E90             | ANY/1STNONRZ    |
| PEDW_CHP_05_FLAG         | Chapter V: Mental and behavioural disorders (Yes/No)                                | F00-F99             | ANY/1STNONRZ    |
| PEDW_CHP_06_FLAG         | Chapter VI: Diseases of the nervous system (Yes/No)                                 | G00-G99             | ANY/1STNONRZ    |
| PEDW_CHP_07_FLAG         | Chapter VII: Diseases of the eye and adnexa (Yes/No)                                | H00-H59             | ANY/1STNONRZ    |
| PEDW_CHP_08_FLAG         | Chapter VIII: Diseases of the ear and mastoid process (Yes/No)                      | H60-H95             | ANY/1STNONRZ    |
| PEDW_CHP_09_FLAG         | Chapter IX: Diseases of the circulatory system (Yes/No)                             | I00-I99             | ANY/1STNONRZ    |
| PEDW_CHP_10_FLAG         | Chapter X: Diseases of the respiratory system (Yes/No)                              | J00-J99             | ANY/1STNONRZ    |
| PEDW_CHP_11_FLAG         | Chapter XI: Diseases of the digestive system (Yes/No)                               | K00-K93             | ANY/1STNONRZ    |
| PEDW_CHP_12_FLAG         | Chapter XII: Diseases of the skin and subcutaneous tissue (Yes/No)                  | L00-L99             | ANY/1STNONRZ    |
| PEDW_CHP_13_FLAG         | Chapter XIII: Diseases of the musculoskeletal system and connective tissue (Yes/No) | M00-M99             | ANY/1STNONRZ    |

| <b>Variable required</b> | <b>Description</b>                                                                                              | <b>ICD-10 codes</b> | <b>Position</b> |
|--------------------------|-----------------------------------------------------------------------------------------------------------------|---------------------|-----------------|
| PEDW_CHP_14_FLAG         | Chapter XIV: Diseases of the genitourinary system (Yes/No)                                                      | N00-N99             | ANY/1STNONRZ    |
| PEDW_CHP_15_FLAG         | Chapter XV: Pregnancy, childbirth and the puerperium (Yes/No)                                                   | O00-O99             | ANY/1STNONRZ    |
| PEDW_CHP_16_FLAG         | Chapter XVI: Certain conditions originating in the perinatal period (Yes/No)                                    | P00-P96             | ANY/1STNONRZ    |
| PEDW_CHP_17_FLAG         | Chapter XVII: Congenital malformations, deformations and chromosomal abnormalities (Yes/No)                     | Q00-Q99             | ANY/1STNONRZ    |
| PEDW_CHP_18_FLAG         | Chapter XVIII: Symptoms, signs and abnormal clinical and laboratory findings, not elsewhere classified (Yes/No) | R00-R99             | ANY/1STNONRZ    |
| PEDW_CHP_19_FLAG         | Chapter XIX: Injury, poisoning and certain other consequences of external causes (Yes/No)                       | S00-T98             | ANY/1STNONRZ    |
| PEDW_CHP_20_FLAG         | Chapter XX: External causes of morbidity and mortality (Yes/No)                                                 | V01-Y98             | ANY/1STNONRZ    |
| PEDW_CHP_21_FLAG         | Chapter XXI: Factors influencing health status and contact with health services (Yes/No)                        | Z00-Z99             | ANY/1STNONRZ    |
| PEDW_CHP_22_FLAG         | Chapter XXII: Codes for special                                                                                 | U00-U85             | ANY/1STNONRZ    |



| <b>Variable required</b> | <b>Description</b>                                                                       | <b>ICD-10 codes</b> | <b>Position</b> |
|--------------------------|------------------------------------------------------------------------------------------|---------------------|-----------------|
|                          | purposes (Yes/No)                                                                        |                     |                 |
| PEDW_OPR_FLAG_01         | Paracentesis abdominis for ascites (Yes/No)                                              | T46                 | ANY             |
| PEDW_OPR_FLAG_02         | Computed tomography of head (Yes/No)                                                     | U05                 | ANY             |
| PEDW_OPR_FLAG_03         | Fibreoptic endoscopic examination of upper gastrointestinal tract (Yes/No)               | G43, G45            | ANY             |
| PEDW_OPR_FLAG_04         | Magnetic resonance imaging (Yes/No)                                                      | U21                 | ANY             |
| PEDW_OPR_FLAG_05         | Fracture procedure (Yes/No)                                                              | V15, W19, W20, W24  | ANY             |
| PEDW_OPR_FLAG_06         | Percutaneous biopsy of lesion of liver (Yes/No)                                          | J13                 | ANY             |
| PEDW_OPR_FLAG_07         | Diagnostic endoscopic examination of lower bowel using fibreoptic sigmoidoscope (Yes/No) | H22, H25            | ANY             |
| PEDW_OPR_FLAG_08         | Imaging of abdomen (Yes/No)                                                              | U08                 | ANY             |
| PEDW_OPR_FLAG_09         | Venesection (Yes/No)                                                                     | X36                 | ANY             |
| PEDW_OPR_FLAG_10         | Ventilation support (Yes/No)                                                             | E85                 | ANY             |
| PEDW_OPR_FLAG_11         | Suture of skin of other site (Yes/No)                                                    | S42                 | ANY             |
| PEDW_OPR_FLAG_12         | Exploration of other skin of other site (Yes/No)                                         | S57                 | ANY             |
| PEDW_OPR_FLAG_13         | Primary open reduction of fracture of                                                    | W26                 | ANY             |

| <b>Variable required</b> | <b>Description</b>                         | <b>ICD-10 codes</b>  | <b>Position</b> |
|--------------------------|--------------------------------------------|----------------------|-----------------|
|                          | bone and extramed (Yes/No)                 |                      |                 |
| PEDW_OPR_FLAG_14         | Reduction of fracture of mandible (Yes/No) | V15                  | ANY             |
| PEDW_OPR_FLAG_15         | Blood transfusion (Yes/No)                 | X33                  | ANY             |
| PEDW_OPR_FLAG_16         | Iv infusion (Yes/No)                       | X29                  | ANY             |
| PEDW_OPR_FLAG_17         | Pleurocentesis (Yes/No)                    | T12                  | ANY             |
| PEDW_OPR_FLAG_18         | Chemo/RT (Yes/No)                          | X65,X67,X68, X70-X73 | ANY             |

ANY: Any of the 14 coding position.

123RZ: The first three coding position or the fourth position if the first three coding positions contain only R or Z code (except of R78.0, Z50.2, Z71.4, Z72.1).

1STNONRZ: The first coding position, which contains neither R nor Z codes.
